# Supplementary material for: Development of porous materials for heterogeneous catalysis: kinetic resolution of epoxides
Source: Royal Society of Chemistry journal article supplement (doi:10.1039/b408553a), 2004-01-01
Supplement: b408553a.doc [file b408553a.doc]

**Supporting Information for:**

Development of porous materials for heterogeneous catalysis: kinetic resolution of epoxides

Leilani L. Welbes, Robert C. Scarrow,‡ and A.S. Borovik*

Department of Chemistry, University of Kansas, 2010 Malott Hall, 1251 Wescoe Dr., Lawrence, KS 66045, USA. Fax: 01 785 8645396; Tel: 01 785 8644670; E-mail: [aborovik@ku.edu](mailto:aborovik@ku.edu); ‡Department of Chemistry, Haverford College, Haverford, PA 19041

## Experimental Section

**General.** Unless otherwise noted, solvents and reagents were used as received from Aldrich (Milwaukee, WI) or Fisher (Pittsburgh, PA). All reactions for ligand and template synthesis, chemical modifications for polymers, and catalytic studies were conducted in glassware with magnetic stirring. Polymerizations were conducted in pressure tubes from Ace Glass, Inc. Yields for products from the kinetic resolution are reported out of 100 % with the theoretical maximum being 50 %.

**Physical Methods.** All proton nuclear magnetic resonance (1H NMR) spectra were collected on a 400 or 500 MHz Bruker spectrometer. Infrared spectra were collected on a Mattson Genesis Series FT-IR spectrometer. Average pore diameters and volumes, and surface areas were determined with a Gemini surface area microanalyzer operating at 77K. Typical sample sizes ranged from 0.14 to 0.18 g, with the polymer particle sizes of 125-500 m. X-band EPR spectra were collected using a Bruker EMX spectrometer equipped with an ER4102ST cavity and measured at 77 K. The instrument was previously calibrated using DPPH. Spectra were collected using the following spectrometer settings: attenuation = 25 dB, microwave power = 0.64 mW, frequency = 9.33 GHz, sweep width = 5000 G, modulation amplitude = 10.02 G, gain = 1.00 x 103, conversion time = 81.92 ms, time constant = 655.36 ms, and resolution = 1024 points. Optical rotation measurements were conducted using a Rudolph Autopol IV automatic polarimeter. X-ray absorption measurements and analyzes were done as described previously.1 Enantiomeric excesses were determined by capillary GC analysis using a Hewlett Packard 6890 Series Gas Chromatograph with He as the carrrier gas. The following GC columns were utilized: Cyclodex-B (30 m x 0.25 mm id x 0.25 m film; J&W Scientific) set at a column head pressure of 18 psi; Chiraldex G-TA (30 m x 0.25 mm id x 0.125 m film) set at a constant flow of 1.5 mL/min.

**4-Benzyloxy-2-*tert*-butyl phenol(2):2** A mixture of *tert*-butyl hydroquinone (22.05 g, 132.6 mmol) and anhydrous potassium carbonate (9.1534 g, 66.228 mmol) was stirred under nitrogen for 30 min at room temperature in 400 mL of acetonitrile (dried over CaH2). After 30 min, 16.0 mL of benzyl chloride (17.6 g, 139 mmol) and 2.2310 g of sodium iodide (13.439 mmol) were added to the reaction mixture and the mixture was refluxed for 18 h under nitrogen. The reaction mixture was allowed to cool to room temperature and upon cooling, 400 mL of water was poured into the reaction mixture, which resulted in the formation of a brown oily layer. The brown oily layer was extracted three times with 300 mL portions of ether. The combined ether layers were washed with brine and then dried over anhydrous magnesium sulfate. The solvent was removed under reduced pressure and the oily residue was purified by column chromatography (silica gel) using ethyl acetate/hexanes (1: 99 to 10:90) as eluent yielding 21.10 g (62.05 %) of product as a pale orange solid. m.p. 87.5-89 C (literature: product reported as a dark orange oil). IR (Teflon): 3447, 2955, 1586, 1504, 1453, 1388, 1363 cm-1. 1H NMR (400 MHz, CDCl3):  1.37 (s, 9H, -C*H*3), 4.91 (s, 1H, -O*H*), 4.97 (s, 2H, -OC*H*2Ph ), 6.52-6.54 (d, 1H, *J* = 8.5 Hz, phenol Ar*H*), 6.62-6.65 (dd, 1H, *J* = 2.9 and 8.5 Hz, phenol Ar*H*), 6.93-6.94 (d, 1H, *J* = 2.9 Hz, phenol Ar*H*), 7.29-7.31 (m, 1H, benzyl Ar*H*), 7.34-7.37 (m, 2H, benzyl Ar*H*), 7.41-7.42 (m, 2H, benzyl Ar*H*). MS (pos FAB): m/z 256.3 (M+), 166.2.

**5-Benzyloxy-3-*tert*-butyl salicylaldehyde** **(3):3** A mixture of **2** (3.0028 g, 11.714 mmol), triethylamine (6.2 mL, 4.5 g, 44 mmol) and anhydrous magnesium dichloride (1.6804 g, 16.891 mmol) was stirred in 100 mL of acetonitrile at room temperature under nitrogen for 30 min followed by the addition of paraformaldehyde (2.3857 g, 79.592 mmol). This mixture was refluxed for 3 h under nitrogen and was then allowed to cool to room temperature. Upon cooling, 100 mL of 5 % HCl was added to the reaction mixture resulting in the formation of an oily layer. The oily layer was extracted three times with 100 mL portions of ether. The combined ether layers were washed with brine and then dried over anhydrous sodium sulfate. The solvent was removed under reduced pressure and the residue was purified by column chromatography (silica gel) using ethyl acetate/hexanes (0:100 to 10:90) as eluent yielding 1.62 g (48.6 %) of product as yellow crystalline solid. m.p. 77-78°C (literature value: 90°C). (Product can be recrystallized from hot petroleum ether if necessary). IR (KBr): 3031, 2963, 2865, 1642, 1598, 1435, 1331, 1224, 1042 cm-1. 1H NMR (400 MHz, CDCl3):  1.39 (s, 9H, -C*H*3), 5.02 (s, 2H, -OC*H*2Ph), 6.861-6.868 (d, 1H, *J* = 3.0 Hz, salicyl Ar*H*), 7.23-7.24 (s, 1H, *J* = 3.0 Hz, salicyl Ar*H*), 7.33-7.44 (m, 5H, benzyl Ar*H*), 9.78 (s, 1H, -C*H*O), 11.53 (s, 1H, -O*H*). MS (pos FAB): m/z 284.2 (M+).

**3-*tert*-butyl-5-hydroxysalicylaldehyde (4):2** Compound **3** (1.9453 g, 6.8410 mmol) was dissolved in 40 mL of toluene with triethylamine (1.0 mL, 7.1 mmol) and Pd/C (10%: 0.2623 g). Nitrogen was bubbled through the reaction mixture for 30 min. The reaction flask was then connected to a balloon containing hydrogen. The reaction mixture was stirred vigorously at room temperature until the majority of the starting material appeared to be consumed as followed by thin layer chromatography. The reaction mixture was filtered through a sintered glass funnel containing a pad of celite. The solvent was removed under reduced pressure and the residue was purified by column chromatography (silica gel) using ethyl acetate/hexanes (5:95 to 20:80) as eluent yielding 0.90 g (68 %) of product as a yellow solid. m.p. 140 C dec. (literature value: 140 C). IR (KBr): 3328, 2961, 2875, 1644, 1587, 1490, 1445, 1385, 1355 cm-1. 1H NMR (400 MHz, CDCl3/DMSO-d6):  1.37 (s, 9H, -C*H*3), 6.88-6.89 (d, 1H, *J* = 2.9 Hz, Ar*H*), 7.05-7.06 (d, 1H, *J* = 2.9 Hz, Ar*H*), 9.03 (s, 1H, -O*H*), 9.81 (s, 1H, -C*H*O), 11.29 (s, 1H, -O*H*). MS (pos FAB): m/z 195.1 (M+), 185.1.

**5-(4-vinylbenzyloxy)-3-*tert*-butylsalicylaldehyde (5):2** A mixture of compound **4** (0.6289 g, 3.238 mmol) and anhydrous potassium carbonate (0.2308 g, 1.670 mmol) was stirred for 30 min at room temperature under nitrogen in 50 mL of acetonitrile. After 30 min, 4-vinylbenzylchloride (0.50 g, 3.3 mmol) and potassium iodide (16.5 mg, 0.0994 mmol) were added to the reaction mixture which was then heated to reflux for 5 h under nitrogen. Upon cooling to room temperature, 25 mL of water was added to the reaction mixture. The reaction mixture was transferred to a separatory funnel containing 25 mL of water. The aqueous layer was extracted three times with 75 mL portions of ether. The combined ether layers were washed with brine and dried over anhydrous sodium sulfate. The solvent was removed under reduced pressure and the residue was purified by column chromatography (silica gel) using ethyl acetate/hexanes (2:98 to 20:80) as eluent yielding 0.69 g (69 %) of product as a yellow solid. m.p. 63-64 C (literature: product reported as an orange oil). IR (Teflon): 3087, 2958, 2869, 1651, 1610, 1435, 1389, 1361 cm-1. 1H NMR (500 MHz, CDCl3):  1.40 (s, 9H, -C*H*3), 5.02 (s, 2H, -OC*H*2Ar), 5.25-5.28 (d, 1H, *J* = 10.9 Hz, cis H(Ph)C=C*H*2), 5.75-5.78 (d, 1H, *J* = 17.6 Hz, trans H(Ph)C=C*H*2), 6.69-6.75 (dd, 1H, *J* = 10.9 and 17.6 Hz, *H*(Ph)C=CH2), 6.86-6.87 (d, 1H, *J* = 3.0 Hz, salicyl Ar*H*), 7.23-7.24 (d, 1H, *J* = 3.0 Hz, salicyl Ar*H*), 7.38-7.40 (d, 2H, *J* = 8.1 Hz, styryl Ar*H*), 7.43-7.44 (d, 2H, *J* = 8.1 Hz, styryl Ar*H*), 9.76 (s, 1H, -C*H*O), 11.53 (s, 1H, -O*H*). MS (pos FAB): m/z 310.1 (M+), 117.0.

**(*R,R*)-*N,N'*-Bis (5-(4-vinylbenzyloxy)-3-*tert*-butyl-salicylidene)-1,2-cyclohexanediamine (H21*):** A 100-mL, two-necked round bottom flask was equipped with a reflux condenser and addition funnel. Sodium hydroxide (0.0976 g, 2.44 mmol) was dissolved in 4 mL of water in a small beaker. After dissolution, (*R,R*)-1,2-diammoniumcyclohexane mono-(+)-tartrate salt4 (0.2220 g, 0.8400 mmol) was added to the sodium hydroxide solution along with 4 mL of methanol and stirred for 15 min to generate the free amine. After 15 min, this solution was added dropwise, via addition funnel, to the 100-mL flask containing **5** (0.5122 g, 1.650 mmol)dissolved in 20 mL of dry methanol and the mixture was heated for 24 h at 40 oC under nitrogen. Reaction stirring was continued at rt for 24 h. The product was collected as a yellow solid by suction filtration rinsing with water, and upon drying yielded 0.4093 g (70.97 %). (Product may also be isolated by extraction with methylene chloride.) m.p. 68 C (polymerizes). IR (KBr): 2933, 2858, 1630, 1594, 1436, 1328, 1151, 1046, 825 cm-1. 1H NMR (400 MHz, CDCl3):  1.39 (s, 18H, -C*H*3), 1.43-1.46 (m, 2H, cyclohexyl), 1.73-1.75 (m, 2H, cyclohexyl), 1.86-1.88 (m, 2H, cyclohexyl),1.96-1.99 (m, 2H, cyclohexyl), 3.28-3.31 (m, 2H, =N-C*H*R), 4.872-4.878 (d, 4H, -OC*H*2Ar), 5.23-5.26 (d, 2H, *J* = 10.9 Hz, cis H(Ph)C=C*H*2), 5.72-5.77 (d, 2H, *J* = 17.6 Hz, trans H(Ph)C=C*H*2), 6.52-6.53 (d, 2H, *J* = 2.9 Hz, salicyl Ar*H*), 6.67-6.74 (dd, 2H, *J* = 10.9 and 17.6 Hz, *H*(Ph)C=CH2), 6.961-6.968 (d, 2H, *J* = 2.9 Hz, salicyl Ar*H*), 7.33-7.35 (d, 4H, *J* = 8.1 Hz, styryl Ar*H*), 7.39-7.41 (d, 4H, *J* = 8.1 Hz, styryl Ar*H*), 8.20 (s, 2H, *H*(Ph)C=N-), 13.49 (s, 2H, -O*H*). MS (pos FAB): m/z 699.3 (M+).

**[CoIII1*(vpy)(dmap)]PF6:** In an inert-atmosphere box, H2**1*** (1.9847 g, 2.8395 mmol) and 4-dimethylaminopyridine (0.3459 g, 2.8313 mmol) were dissolved in 40 mL of CH2Cl2 in a 250 mL flask. Addition of a solution of anhydrous Co(OAc)2 (0.641 g, 3.62 mmol) in dry methanol (40 mL) resulted in the immediate formation of a brown heterogeneous solution that was stirred for 30 min under an argon atmosphere. After 30 min, the capped solution was removed from the inert atmosphere box and placed under a nitrogen atmosphere. Ferrocenium hexafluorophosphate (1.304 g, 3.940 mmol) dissolved in acetonitrile (40 mL) was quickly added to the reaction mixture via syringe followed immediately by 4-vinylpyridine (0.3025 g, 2.877 mmol) dissolved in CH2Cl2  (20 mL). Addition of FeCp2PF6 and 4-vinylpyridine resulted in the formation of a dark brown, homogeneous solution that was stirred for 1 h under nitrogen before removing solvent under reduced pressure. The brown residue was purified by column chromatography (lipophilic Sephadex) using methylene chloride/acetonitrile (1:1) yielding 2.2443 g (70.257 %) of product as a brown solid. (Alternatively, the product may be purified by column chromatography with lipophilic Sephadex using methylene chloride/acetonitrile (1:1) followed by soxhlet extraction of the resulting residue with ether and subsequent removal of ether under reduced pressure.) Analysis calculated for [CoIII**1***(vpy)(dmap)]PF6**:** C78H69CoF6N5O4P; C, 63.82; H, 6.16; N, 6.20. Found: C, 64.23; H, 6.05; N, 5.40. IR (KBr): 2946, 2867, 1624, 1540, 1426, 1353, 1196, 1059, 839 cm-1. 1H NMR (500 MHz, CDCl3):  1.34-1.39 (d, 18H, -C*H*3), 1.51-1.56 (m, 4H, cyclohexyl), 1.81-1.90 (m, 2H, cyclohexyl), 1.98-1.99 (m, 2H, cyclohexyl), 2.90-2.91 (d, 6H, -C*H*3 from dmap), 3.36-3.41 (m, 2H, =N-C*H*R), 4.98 (broad s, 4H, -OC*H*2Ar), 5.23-5.25 (d, 2H, *J* = 10.8 Hz, cis H(Ph)C=C*H*2), 5.51-5.55 (dd, 1H, *J* = 8 and 10 Hz, cis H(py)C=C*H*2), 5.74-5.77 (d, 2H, *J* = 17.6 Hz, trans H(Ph)C=C*H*2), 5.91-5.96 (dd, 1 H, *J* = 7 and 18 Hz, trans H(py)C=C*H*2), 6.24-6.25 (d, 1H, *J* = 7 Hz, Ar*H*), 6.47-6.51 (dd, 1H, *J* = 11 and 16 Hz *H*(py)C=CH2 (assignment supported by COSY spectrum)), 6.67-6.74 (m, 4H, *H*(Ph)C=CH2 (assignment supported by COSY spectrum), Ar*H*), 7.10-7.16 (m, 4 H, Ar*H*), 7.22-7.23 (d, 1H, *J* = 7 Hz, Ar*H*), 7.30-7.31 (d, 1H, *J* = 7 Hz, Ar*H*), 7.41 (broad s, 9H, Ar*H*), 7.78-7.80 (d, 1H, *J* = 6 Hz, Ar*H*), 7.85-7.87 (d, 1H, *J* = 6 Hz, Ar*H*), 7.90-8.01 (m, 2H, *H*(Ph)C=N-).

**P-1*(py)[CoIII(dmap)] (50 mol % template):** A mixture of [CoIII**1***(vpy)(dmap)]PF6 (2.2443 g, 1.9892 mmol), EGDMA (0.385, 1.94 mmol) and AIBN (0.0304 g, 0.185 mmol) in 6-8 mL of DMF was heated in a sealed pressure tube under nitrogen for 24 h in an oil bath preheated to 65 ± 5 °C. After 24 h, the temperature was increased to 75 ± 5 °C and maintained for 24 h. The temperature was then increased to and maintained at 110 ± 5 °C for an additional 12 h. The monolithic copolymer was then broken up, removed from the pressure tube, and pulverized with a mortar and pestle. The material was continuously extracted for 24 h with methylene chloride to yield 2.3942 g of a dark brown polymer upon drying. Analysis: Calculated for P-**1*(py)**[CoIII(dmap)] (50 mol % template): Co, 756 mol/g of polymer; N, 5.30 %. Found: Co, 604 mol/g of polymer; N, 4.01%. Average surface area (BET): 0.4650 m2/g. Cumulative pore volume (BJH adsorption): 0.000416 cm3/g. Average pore diameter: 82 Å.

**P-1*(py)[CoIII(dmap)] (25 mol % template):** Polymer incorporating 25 mol % of [CoIII**1***(vpy)(dmap)]PF6was prepared in a similar manner to that of the 50 mol % templated material with the following modification. The pressure tube was placed in an oil bath preheated to 65 ± 5 °C and maintained at this temperature for 48 h during polymerization. Analysis: Calculated for P-**1*(py)**[CoIII(dmap)] (25 mol % template): Co, 586 mol/g of polymer; N, 4.11 %. Found: Co, 451 mol/g of polymer; N, 2.93 %. Average surface area (BET): 1.2 m2/g. Cumulative pore volume (BJH adsorption): 0.00177 cm3/g. Average pore diameter: 65 Å.

**P-1*(py)[CoIII(dmap)] (5 mol % template):** Polymer incorporating 5 mol % of [CoIII**1***(vpy)(dmap)]PF6 was prepared in a similar manner to that of the 50 mol % templated material with the following modification. The pressure tube was placed in an oil bath preheated to 65 ± 5 °C and maintained at this temperature for 24 h during polymerization. Analysis: Calculated for P-**1*(py)**[CoIII(dmap)] (5 mol % template): Co, 205 mol/g of polymer; N, 1.43 %. Found: Co, 161 mol/g of polymer; N, 0.94 % found. Average surface area (BET): 48 m2/g. Cumulative pore volume (BJH adsorption): 0.0421 cm3/g. Average pore diameter: 38 Å.

**P-1*(py)[CoII] (50 mol % template):** In an inert atmosphere box, 1.5079 g of P-**1*(py)**[CoIII(dmap)] (50 mol % template) was treated with bis(pentamethylcyclopentadienyl)iron (II) (0.5584 g, 1.711 mmol) dissolved in methylene chloride for 24 h at room temperature. After 24 h, the material was collected by suction filtration under an inert atmosphere and soxhlet extracted under nitrogen with methylene chloride for 24 h. Analysis: Found: Co, 594 mol/g of polymer; N, 4.37 %.

**P-1*(py)[CoII] (25 mol % template):** Prepared according to procedures reported for P-**1*(py)**[CoII] (50 mol % template). Analysis: Found: Co, 378 mol/g of polymer; N, 2.54 % found.

**P-1*(py)[CoII] (5 mol % template):** Prepared according to procedures reported for P-**1*(py)**[CoII] (50 mol % template). Analysis: Found: Co, 120 mol/g of polymer; N, 0.80 % found.

**HKR of Propylene Oxide (using material with 50 mol % template):** A 0.197 g portion of P-**1*(py)**[CoII] (50 mol % template) was treated with excess acetic acid (82 L) in 10 mL of toluene for 24 h at room temperature under aerobic conditions. After 24 h, excess acid and solvent was removed under reduced pressure. (±)-Propylene oxide (5.0 mL, 71 mmol) was added via syringe to a capped reaction flask containing the activated material followed by the addition of water (0.71 mL, 39 mmol) via syringe. The heterogeneous mixture was stirred vigorously at room temperature for 48 h after which unreacted propylene oxide (2.5865 g, 44.533 mmol, 62 %) was distilled from the reaction mixture under atmospheric pressure at 34 °C. The ee of the propylene oxide was determined to be 22 % (*R)* by chiral GC analysis of the 1-azido-2-trimethylsiloxypropane5 derivative obtained by opening the epoxide with TMSN3 in the presence of (*R,R*)-*N,N'*-bis(3,5-di-*tert*-butylsalicylidene)-1,2-ethylenediaminato]chromium (III) chloride catalyst (0.02 eq) (Cyclodex-B, 75 °C, isothermal, *t*R(major) = 9.211 min, *t*R(minor) = 9.486 min). []20D +0.878° (*c* 1.139, CHCl3); lit.6 []23D –11.6° (neat, *S*-epoxide). The catalyst was recovered by suspension in acetone and collected by vacuum filtration rinsing with excess acetone to remove entrapped 1,2-propanediol from the material. Concentration of the filtrate yielded 1,2-propanediol (1.1424 g (determined by GC analysis), 15.012 mmol, 21 %). The %ee of the diol was determined to be 81 % (*S)* by chiral GC analysis of the bistrifluoroacetate derivative (Chiraldex G-TA, method, 60 °C, 2 min, 10 °C/min, *t*R(minor) = 4.845 min, *t*R(major) = 5.583 min). []20D +22.685° (*c* 1.020, CHCl3); lit.7 []25D +17.48° (neat).

## Cycling Studies with P-1*(py)[Co(OAc)] (50 mol % template): After the epoxide and diol were isolated from the first cycle, the material was treated with 0.1 M K2CO3 in methanol/water (1:1) for 24 h at room temperature. The material was then collected by vacuum filtration rinsing with water and acetone. The material was retreated with excess acetic acid in toluene (10 mL) at room temperature open to air for 24 h. Upon removal of excess acid and toluene under reduced pressure, the material was ready for cycle 2. This procedure was followed after each subsequent cycle.

**Table 1.** Cycling studies in the hydrolytic kinetic resolution of propylene oxide

| Entry | % Template | Polymer Batch | Reaction # | Cycle  # | Time | % Yield Epoxide  (%ee) | % Yield Diol (%ee) |
| --- | --- | --- | --- | --- | --- | --- | --- |
| 1 | 50 | 1 | 1 | 1 | 24 | 62(22) | 20(83) |
| 2 | 50 | 1 | 1 | 2 | 24 | 46(39) | 32(85) |
| 3 | 50 | 1 | 1 | 3 | 24 | 50(42) | 31(86) |
| 4 | 50 | 1 | 1 | 4 | 24 | 50(33) | 26( 85) |
| 5 | 50 | 1 | 1 | 5 | 24 | 55(36) | 26(86) |
| 6 | 50 | 2 | 1 | 1 | 48 | 62(22) | 21(81) |
| 7 | 50 | 2 | 1 | 2 | 48 | 43(37) | 31(87) |
| 8 | 50 | 2 | 1 | 3 | 48 | 40(47) | 30(88) |
| 9 | 50 | 2 | 1 | 4 | 48 | 52(30) | 24(88) |
| 10 | 50 | 2 | 1 | 5 | 48 | 43(37) | 16(89) |
| 11 | 50 | 2 | 2 | 1 | 48 | 62(22) | 24(81) |
| 12 | 50 | 2 | 2 | 2 | 48 | 40(40) | 32(88) |
| 13 | 50 | 2 | 2 | 3 | 48 | 34(53) | 35(88) |
| 14 | 50 | 2 | 2 | 4 | 48 | 50(31) | 24(88) |
| 15 | 50 | 2 | 2 | 5 | 48 | 46(37) | 21(89) |
| 16 | 50 | 2 | 1 | 1 | 12 | 83(3) | 4(74) |
| 17 | 50 | 2 | 1 | 2 | 12 | 82(2) | 2(75) |
| 18 | 50 | 2 | 1 | 3 | 12 | 84(1) | 3(71) |
| 19 | 25 | 1 | 1 | 1 | 24 | 60(13) | 13(76) |
| 20 | 25 | 1 | 1 | 2 | 24 | 82(7) | 8(80) |
| 21 | 25 | 1 | 1 | 3 | 24 | 70(9) | 9(80) |
| 22 | 25 | 1 | 2 | 1 | 24 | 62(14) | 14(76) |
| 23 | 25 | 1 | 2 | 2 | 24 | 65(7) | 9(79) |
| 24 | 25 | 1 | 2 | 3 | 24 | 74(5) | 6(76) |
| 25 | 25 | 2 | 1 | 1 | 24 | 62(8) | 8(80) |
| 26 | 25 | 2 | 1 | 2 | 24 | 80(6) | 7(79) |
| 27 | 25 | 2 | 1 | 3 | 24 | 67(4) | 5(76) |
| 28 | 25 | 2 | 2 | 1 | 24 | 61(10) | 10(80) |
| 29 | 25 | 2 | 2 | 2 | 24 | 71(7) | 7(80) |
| 30 | 25 | 2 | 2 | 3 | 24 | 74(5) | 6(78) |
| 31 | 5 | 1 | 1 | 1 | 24 | 54(10) | 10(77) |
| 32 | 5 | 1 | 1 | 2 | 24 | 54(1) | 1(73) |
| 33 | 5 | 1 | 1 | 3 | 24 | 68(1) | 1(71) |
| 34 | 5 | 1 | 2 | 1 | 24 | 70(2) | 2(71) |
| 35 | 5 | 1 | 2 | 2 | 24 | 82(<1) | 1(58) |
| 36 | 5 | 1 | 2 | 3 | 24 | 49(<1) | <1(57) |
| 37 | 5 | 2 | 1 | 1 | 24 | 53(10) | 10(78) |
| 38 | 5 | 2 | 1 | 2 | 24 | 54(<1) | 1(--) |
| 39 | 5 | 2 | 1 | 3 | 24 | 70(1) | 1(66) |
| 40 | 5 | 2 | 2 | 1 | 24 | 66(4) | 5(76) |
| 41 | 5 | 2 | 2 | 2 | 24 | 79(<1) | <1(56) |
| 42 | 5 | 2 | 2 | 3 | 24 | 62(<1) | <1(53) |

# References

(1) K. M. Padden, J. F. Krebs, K. T. Trafford, G. P. A. Yap, A. H. Rheingold, A. S. Borovik and R. C. Scarrow, *Chem. Mater*., 2001, **13**, 4305.

(2) B. B. De, B. B. Lohray, S. Sivaram and P. K. Dahl, *J. Poly. Sci. A.,* 1997, **35**, 1809.

(3) N. U. Hofsløkken, and L. Skattebøl, *Acta Chemica Scadinavica*, 1999, **53**, 258.

(4) Prepared by the resolution of *cis/trans*-1,2-diaminocyclohexane according to literature procedure reported in: J. F. Larrow, Y. Gao, Y. Hong, X. Nie, C. M. Zepp and E. N. Jacobsen, *J. Org. Chem.,* 1994, **59**, 1939.

(5) J. F. Larrow, S. E. Schaus and E. N. Jacobsen, *J. Am. Chem. Soc.,* 1996, **118**, 7420.

(6) S. E. Schaus, B. D. Brandes, J. F. Larrow, M. Tokunaga, K. B. Hansen, A. E. Gould, M. E. Furrow and E. N. Jacobsen, *J. Am. Chem. Soc.,* 2002, **124**, 1307.

(7) M. D. Fryzuk and B. Bosnich, *J. Am. Chem. Soc.*, 1978, **100**, 5491.
